# Supplementary material for: Adsorption of oxalate on anatase (100) and rutile (110) surfaces in aqueous systems: experimental results vs. theoretical predictions
Source: Royal Society of Chemistry journal article supplement (doi:10.1039/b814608j), 2009-01-01
Supplement: b814608j.pdf [file b814608j.pdf]

## Supplementary information

Manuscript: “Adsorption of Oxalate on Anatase (100) and Rutile (110) Surfaces in Aqueous Systems: Experimental Results vs. Theoretical Predictions”

Authors: Cecilia B. Mendive, Thomas Bredow, Armin Feldhoff, Miguel Blesa, and Detlef Bahnemann

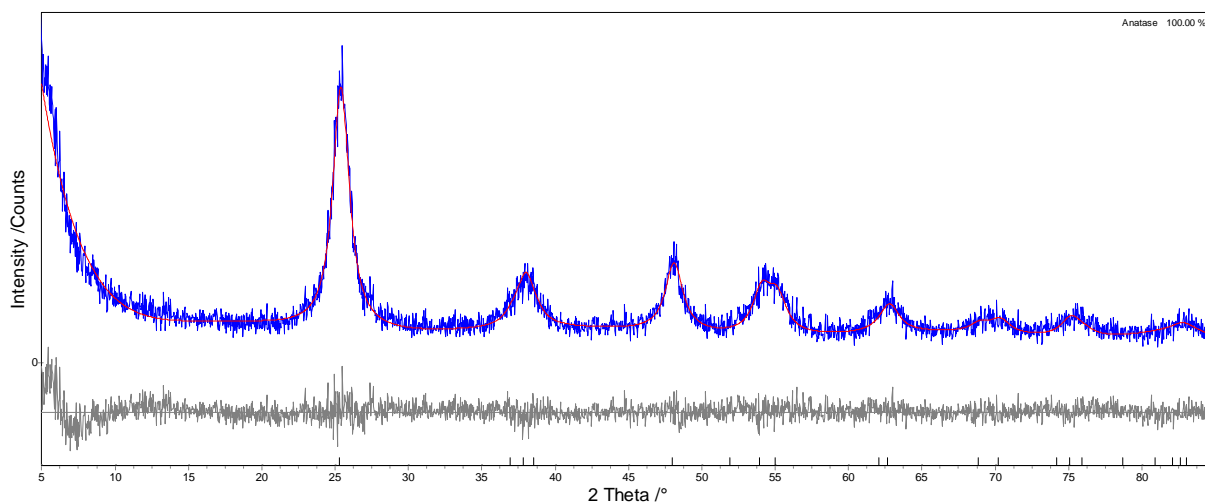

**Figure 1SA.** X-Ray Diffractogram of the commercial product FinnTi S230 (S230). The powder corresponds to pure anatase.
